# Supplementary material
Source: PubMed Central journal article supplement (PMC384749)

13mgSTX gHMBC ni=128 nt=32 30min 030806

Pulse Sequence: gHMBC

Solvent: D2O  
Temp. 20.0 C / 293.1 K  
File: STX13mgHMBCJ=8  
INOVA-600 "inova600"

Relax. delay 1.000 sec  
Acq. time 0.129 sec  
Width 3974.6 Hz  
2D Width 25974.0 Hz  
32 repetitions  
128 increments  
OBSERVE H1, 599.9146261 MHz  
DATA PROCESSING  
Sine bell 0.064 sec  
F1 DATA PROCESSING  
Gauss window 0.004 sec  
center at 0.000 sec  
FT size 1024 x 2048  
Total time 1 hr, 23 min, (1:23:00)

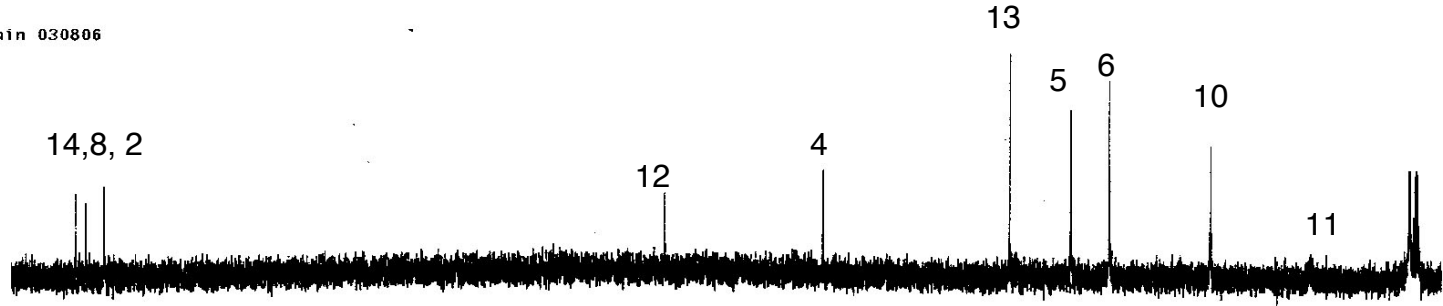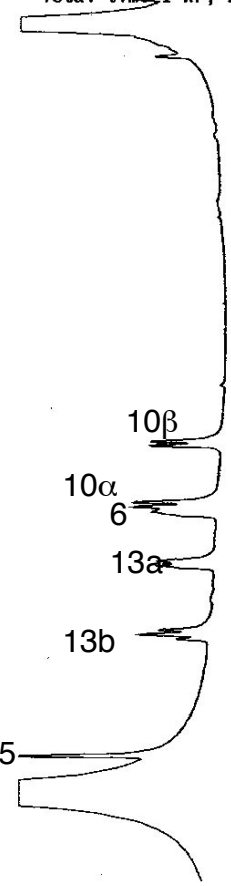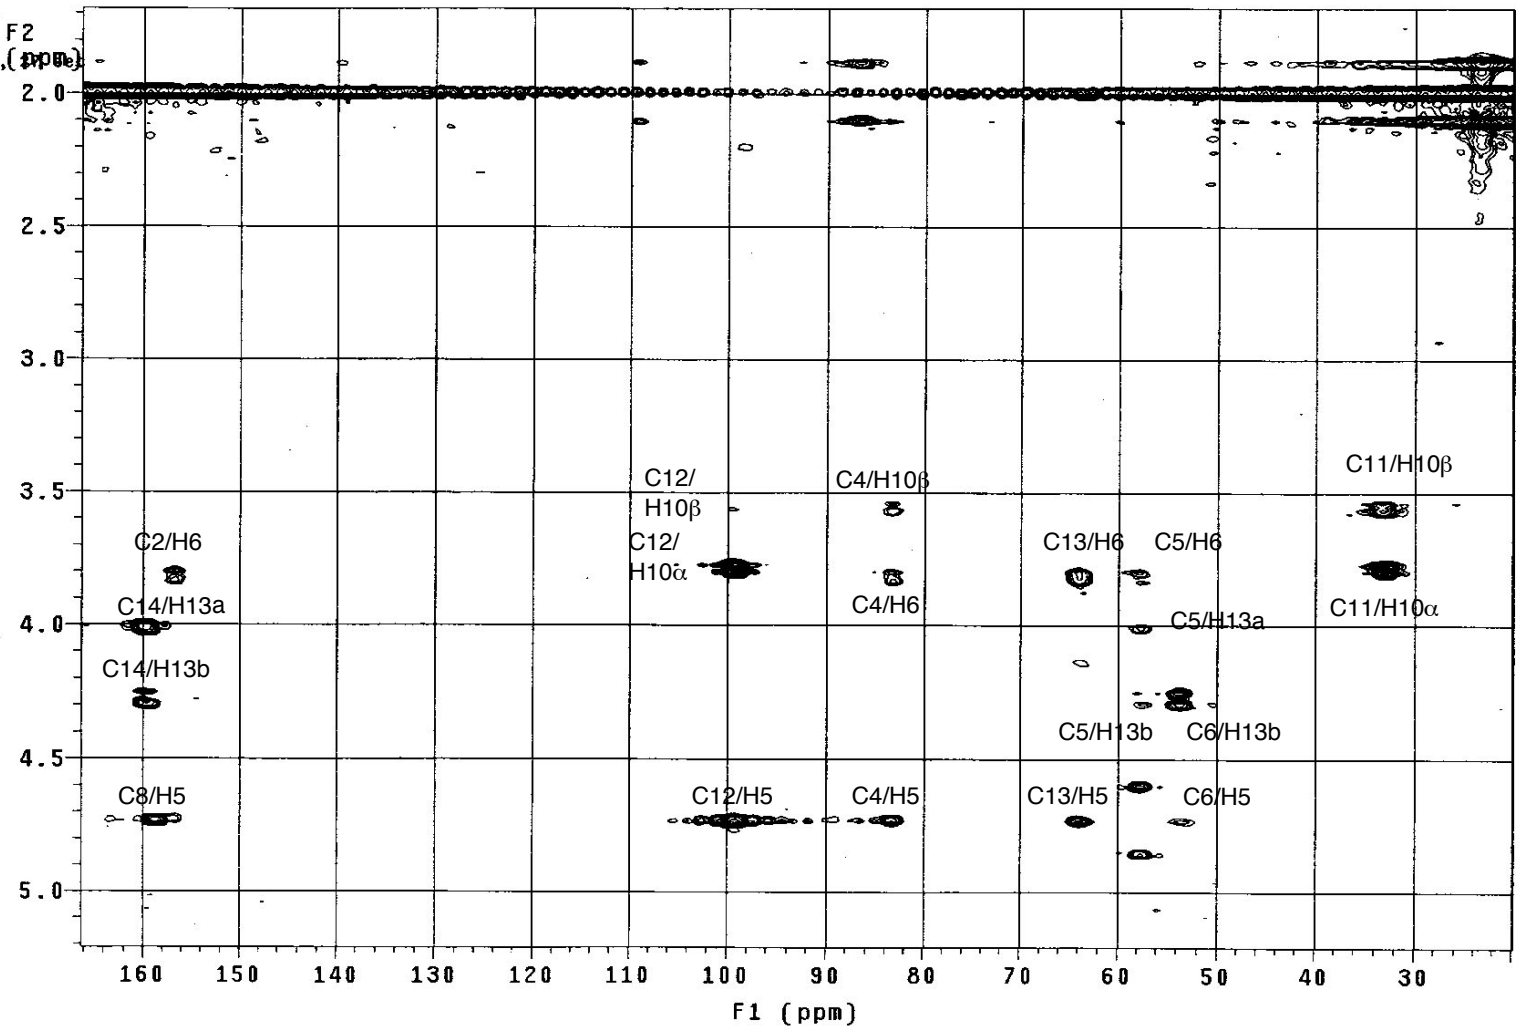

Supplement: pnas_101_13_4346__6.pdf [file pnas_101_13_4346__6.pdf]
