# Supplementary material
Source: PubMed Central journal article supplement (PMC384749)

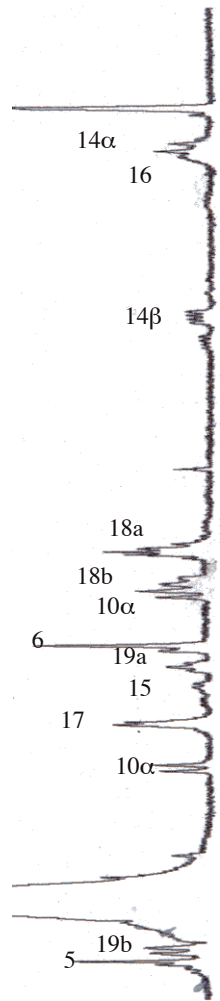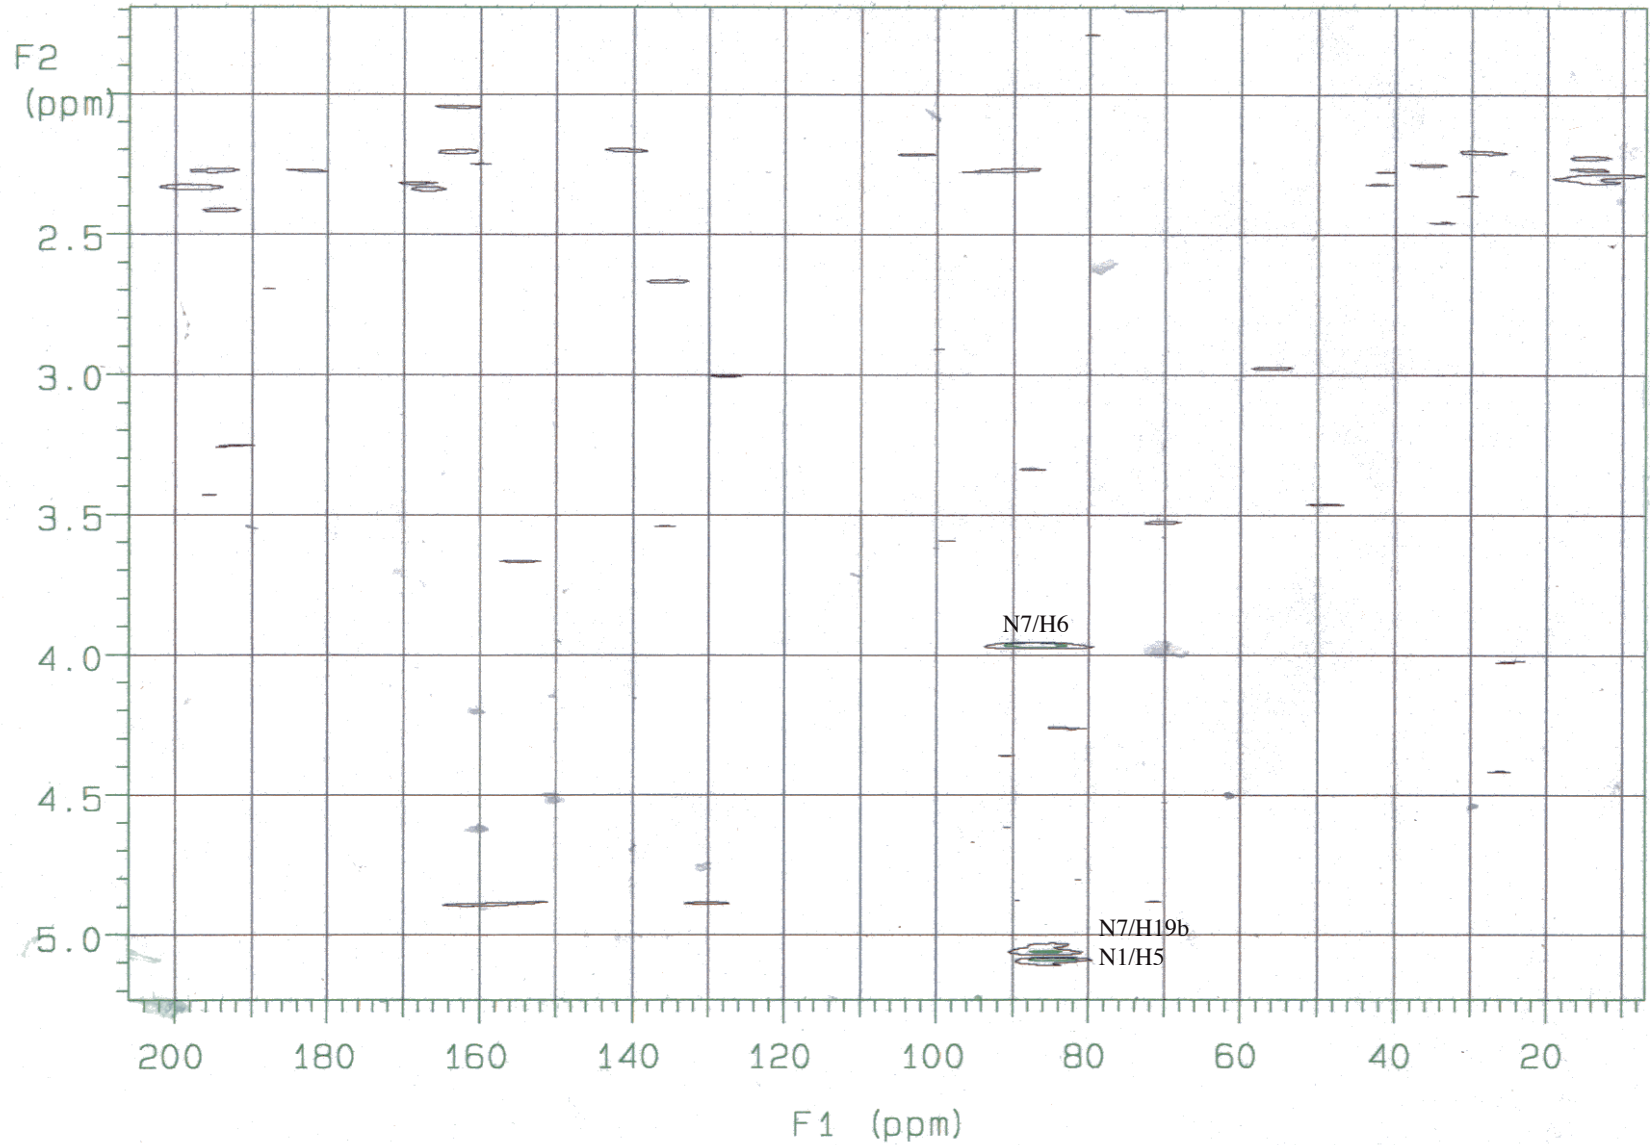

Supplement: pnas_101_13_4346__2.pdf [file pnas_101_13_4346__2.pdf]

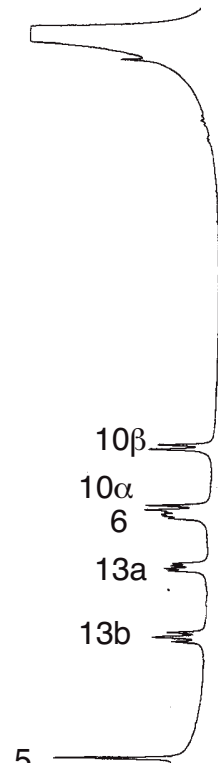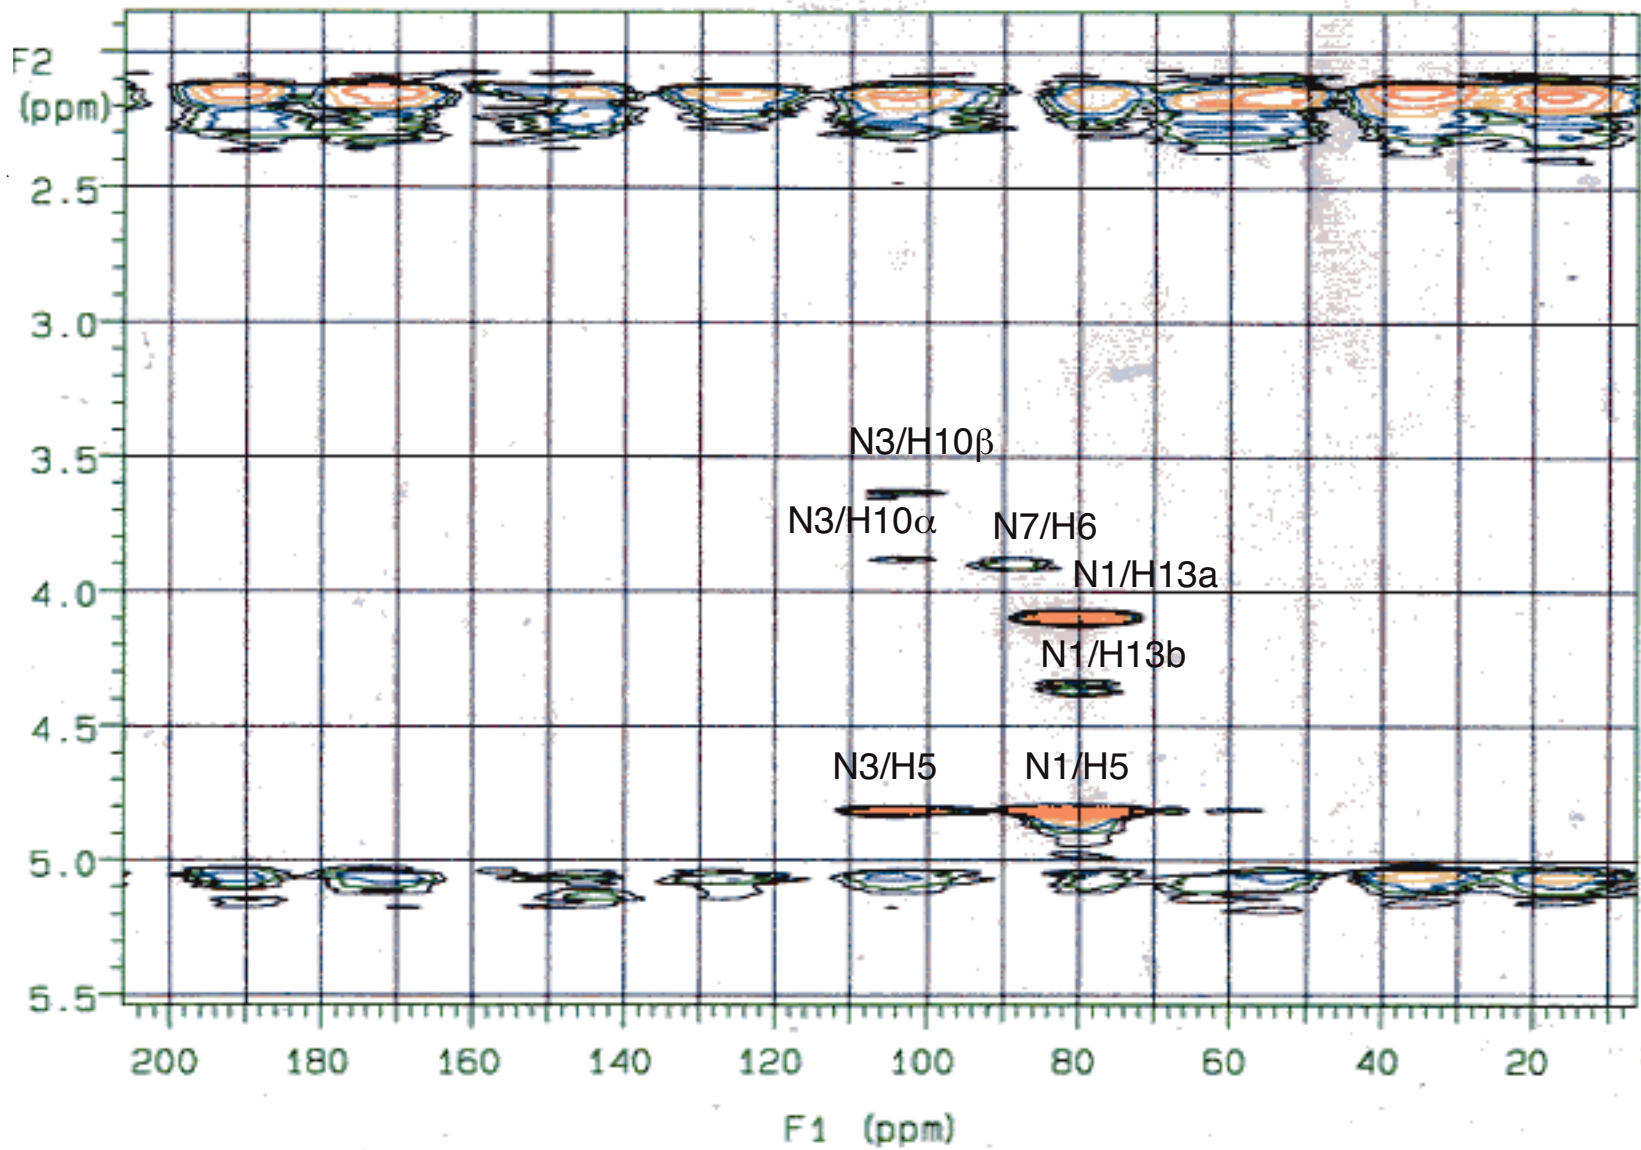

Supplement: pnas_101_13_4346__4.pdf [file pnas_101_13_4346__4.pdf]

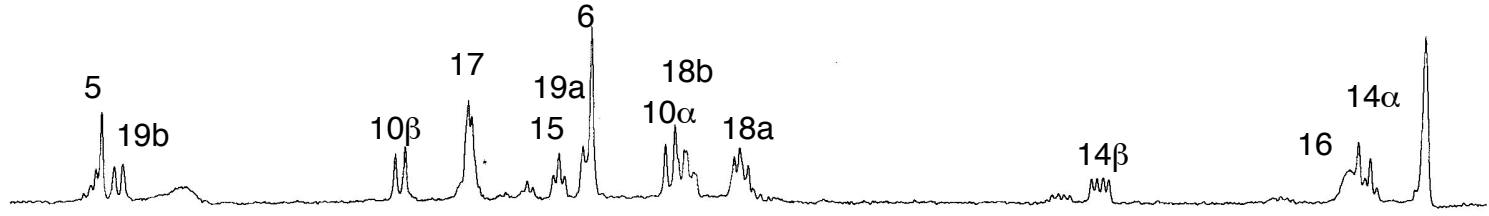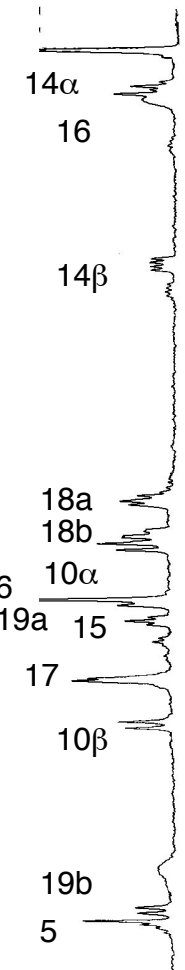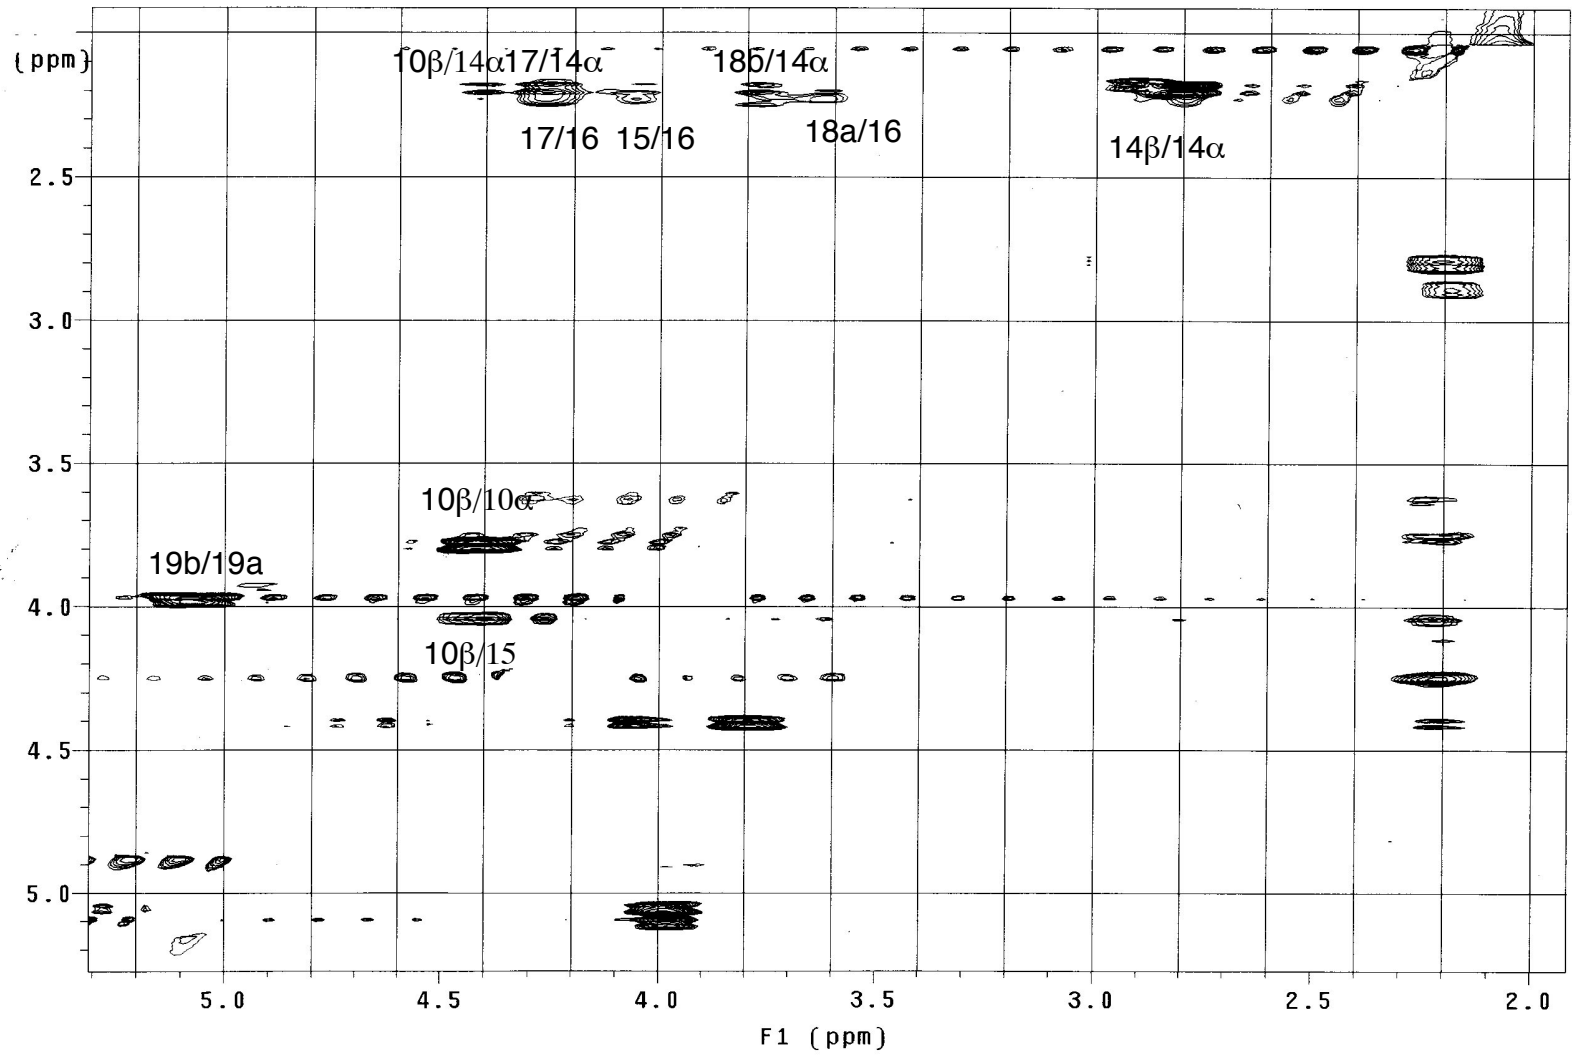

Supplement: pnas_101_13_4346__8.pdf [file pnas_101_13_4346__8.pdf]
